# Supplementary material for: A new lymph node infection model for Streptococcus suis serotype 2 in pigs
Source: Springer Nature journal article supplement (doi:10.1186/s13567-025-01616-7), 2025-10-02
Supplement: MOESM3 [file 13567_2025_1616_MOESM3_ESM.pdf]

**Additional file 3** Reisolation of the infection strain from inner organs or joint fluid

|                         | No reisolation<br>from inner<br>organs/joints | Reisolation from |            |                       |        |      |       |        |       |                        |       |        |                |
|-------------------------|-----------------------------------------------|------------------|------------|-----------------------|--------|------|-------|--------|-------|------------------------|-------|--------|----------------|
|                         |                                               | 1 site           | 2<br>sites | 3 or<br>more<br>sites | Spleen | Lung | Liver | Liquor | Brain | Left<br>heart<br>valve | Blood | Serosa | Joint<br>fluid |
| <b>Non-infected</b>     | 2/2                                           | 0/2              | 0/2        | 0/2                   | 0/2    | 0/2  | 0/2   | 0/2    | 0/2   | 0/2                    | 0/2   | 0/2    | 0/2            |
| <b>Infected (total)</b> | 1/8                                           | 2/8              | 0/2        | 5/8                   | 5/8    | 3/8  | 4/8   | 1/8    | 3/8   | 4/8                    | 5/8   | 3/8    | 4/8            |
| • <b>Group 1</b>        | 1/4                                           | 1/4              | 0/2        | 2/4                   | 3/4    | 2/4  | 2/4   | 0/4    | 0/4   | 2/4                    | 2/4   | 2/4    | 2/4            |
| • <b>Group 2</b>        | 0/4                                           | 1/4              | 0/2        | 3/4                   | 2/4    | 1/4  | 2/4   | 1/4    | 3/4   | 2/4                    | 3/4   | 1/4    | 2/4            |
