# Supplementary material for: A new lymph node infection model for Streptococcus suis serotype 2 in pigs
Source: Springer Nature journal article supplement (doi:10.1186/s13567-025-01616-7), 2025-10-02
Supplement: MOESM5 [file 13567_2025_1616_MOESM5_ESM.pdf]

### Additional file 5: Detailed information to the individual pigs

| Animal # | Time of euthanasia post inf. | Max. body temperature (°C) | Number of reisolation sites <sup>a</sup> | Isolation from |      |       |        |       |                  |       |                     |                   |                    |                   |                    | Clinical signs (CNS) | Clinical signs (lameness) |                                    |          |
|----------|------------------------------|----------------------------|------------------------------------------|----------------|------|-------|--------|-------|------------------|-------|---------------------|-------------------|--------------------|-------------------|--------------------|----------------------|---------------------------|------------------------------------|----------|
|          |                              |                            |                                          | Spleen         | Lung | Liver | Liquor | Brain | Left heart valve | Blood | Serosa <sup>b</sup> | Carpal joint left | Carpal joint right | Tarsal joint left | Tarsal joint right |                      |                           |                                    |          |
| 1        | 24 h                         | 39.0                       | 0                                        |                |      |       |        |       |                  |       |                     |                   |                    |                   |                    |                      |                           |                                    |          |
| 2        | 70 h                         | 39.1                       | 0                                        |                |      |       |        |       |                  |       |                     |                   |                    |                   |                    |                      |                           |                                    |          |
| 3        | 24 h                         | 40.7                       | 13                                       | X              | X    | X     |        |       |                  | X     | X                   | X                 | X                  |                   |                    |                      | X                         |                                    |          |
| 4        | 24 h                         | 41.1                       | 18                                       | X              | X    | X     |        |       |                  | X     | X                   | X                 |                    | X                 | X                  | X                    |                           | hgr <sup>c</sup> l TJ <sup>d</sup> |          |
| 5        | 24 h                         | 39.1                       | 2                                        |                |      |       |        |       |                  |       |                     |                   |                    |                   |                    |                      |                           |                                    |          |
| 6        | 24 h                         | 40.1                       | 6                                        | X              |      |       |        |       |                  |       |                     |                   |                    |                   |                    |                      |                           |                                    |          |
| 7        | 48 h                         | 41.3                       | 8                                        |                |      |       |        | X     |                  | X     |                     |                   |                    |                   |                    |                      | X                         | hgr r TJ                           |          |
| 8        | 48 h                         | 40.8                       | 2                                        |                |      | X     |        |       |                  |       |                     |                   |                    |                   |                    |                      |                           | hgr r CJ                           |          |
| 9        | 56 h                         | 41.1                       | 11                                       | X              |      |       |        | X     | X                | X     | X                   |                   |                    |                   |                    | X                    |                           | hgr r TJ                           |          |
| 10       | 70 h                         | 41.0                       | 10                                       | X              | X    | X     | X      | X     | X                | X     |                     |                   |                    |                   |                    |                      |                           | X                                  | lgr r TJ |

<sup>a</sup> Isolation from lymph nodes, joint fluid, or inner organs

<sup>b</sup> Pleura, pericard, or peritoneum

<sup>c</sup> hgr – high grade/severe lameness; lgr – low grade/mild lameness

<sup>d</sup> l TJ – left tarsal joint; r TJ – right tarsal joint; r CJ – right carpal joint

Continuing Additional file 5: Detailed information to the individual pigs

| Animal # | Isolation from                 |                           |                             |                            |                            |                           |                             |                            |                               |                              |                             |                            |
|----------|--------------------------------|---------------------------|-----------------------------|----------------------------|----------------------------|---------------------------|-----------------------------|----------------------------|-------------------------------|------------------------------|-----------------------------|----------------------------|
|          | <i>Ln. tracheo bronchialis</i> | LN of the small intestine | <i>Ln. subiliacus right</i> | <i>Ln. subiliacus left</i> | <i>Ln. popliteus right</i> | <i>Ln. popliteus left</i> | <i>Ln. cervicalis right</i> | <i>Ln. cervicalis left</i> | <i>Ln. mandibularis right</i> | <i>Ln. mandibularis left</i> | <i>Ln. inguinalis right</i> | <i>Ln. inguinalis left</i> |
| 1        |                                |                           |                             |                            |                            |                           |                             |                            |                               |                              |                             |                            |
| 2        |                                |                           |                             |                            |                            |                           |                             |                            |                               |                              |                             |                            |
| 3        |                                |                           |                             |                            |                            |                           | X                           | X                          | X                             | X                            |                             | X                          |
| 4        | X                              | X                         | X                           |                            |                            |                           | X                           | X                          | X                             | X                            | X                           |                            |
| 5        |                                |                           |                             |                            |                            |                           |                             | X                          |                               | X                            |                             |                            |
| 6        | X                              |                           |                             |                            |                            |                           | X                           | X                          | X                             | X                            |                             |                            |
| 7        |                                |                           |                             |                            | X                          |                           |                             | X                          | X                             | X                            | X                           |                            |
| 8        |                                |                           |                             |                            |                            |                           |                             | X                          |                               |                              |                             |                            |
| 9        | X                              |                           | X                           |                            |                            | X                         |                             | X                          |                               |                              |                             | X                          |
| 10       | X                              |                           |                             |                            |                            |                           |                             | X                          |                               | X                            |                             |                            |
